# Supplementary material
Source: PubMed Central journal article supplement (PMC3758363)
Supplement: NIHMS495532-supplement-2.pdf [file NIHMS495532-supplement-2.pdf]

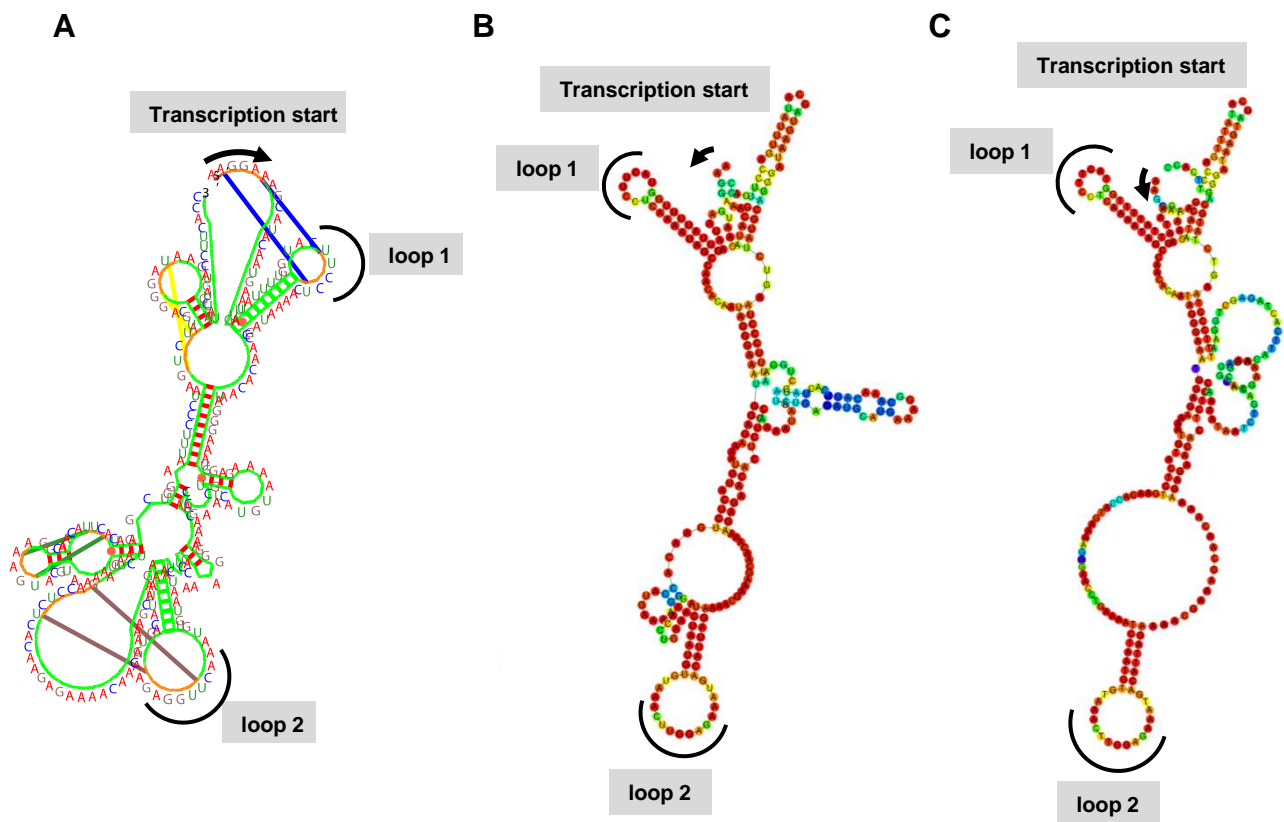

**Figure S1. Secondary structure of IFN- $\epsilon$  5'UTR generated using publicly-available prediction tools, and alignment of the region among several primates**

A. KineFold ( <http://kinfold.curie.fr/> )

B. RNAfold, MFE ( <http://rna.tbi.univie.ac.at> )

C. RNAfold, Centroid ( <http://rna.tbi.univie.ac.at> )
