# Supplementary material
Source: PubMed Central journal article supplement (PMC3758363)
Supplement: NIHMS495532-supplement-3.pdf [file NIHMS495532-supplement-3.pdf]

A

**IFN-ε 5'UTR** →

AAGGAAAGCA UACAAUGAAU AAGUUAUUUU GGUACUCCU CAAAAUAGCC AACACAAUAG  
 ..... AACUUAUA CCUACUCCU CAAAAUAGC .....

**loop 1 mutant**

**loop 2**

GGAAAUGGAG AAAAUGUACU CUGAACACCA UGAAAAGGGA ACCUGAAAAU CUAAUGUGUA  
 ..... ACCUGAAAAU CAUAUCUGUA .....

**loop 2 mutant**

AACUUGGAGA AAUGACAUUA GAAAACGAAA GCAACAAAAG AGAACACUCU CCAAAAUAAU  
 CUGAGAUGCA UGAAAGGCAA ACAUUCACUA GAGCUGGAU UUCCCUAAGU CUAUGCAGGG  
 AUAAGUAGCA UAUUUGACCU UCACCAUG-3'

START

B

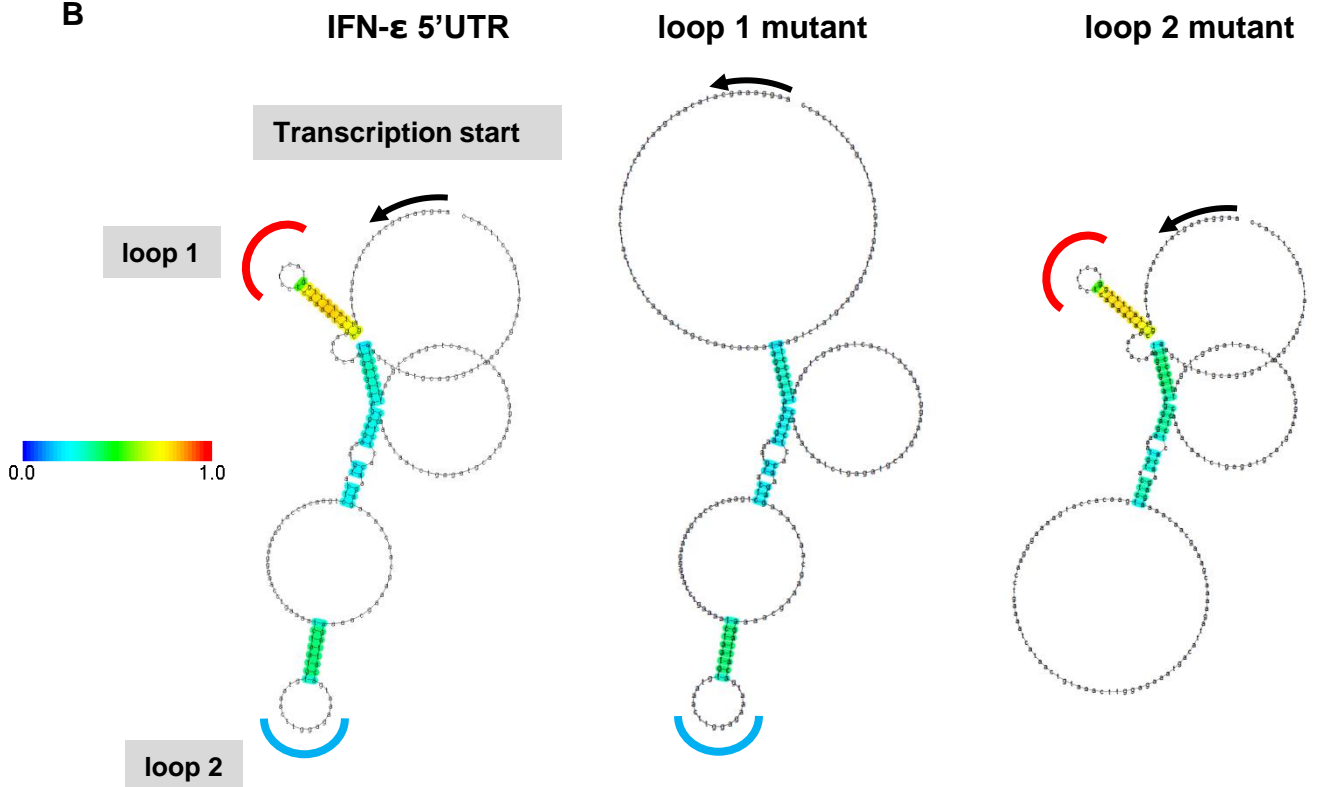

**Figure S2. Disruption of loop structures IFN-ε 5'UTR mRNA using site-directed mutagenesis**  
 A. Sequence of wild-type IFN-e 5'UTR and mutations introduced to disrupt the secondary structure of loops 1 and 2. Mutated nucleotides are shown in red.  
 B. Secondary structure of wild-type and mutant IFN-e 5'UTR, as predicted by CentroidFold.
