# Supplementary material
Source: PubMed Central journal article supplement (PMC3758363)

# HIF-1 5'UTR

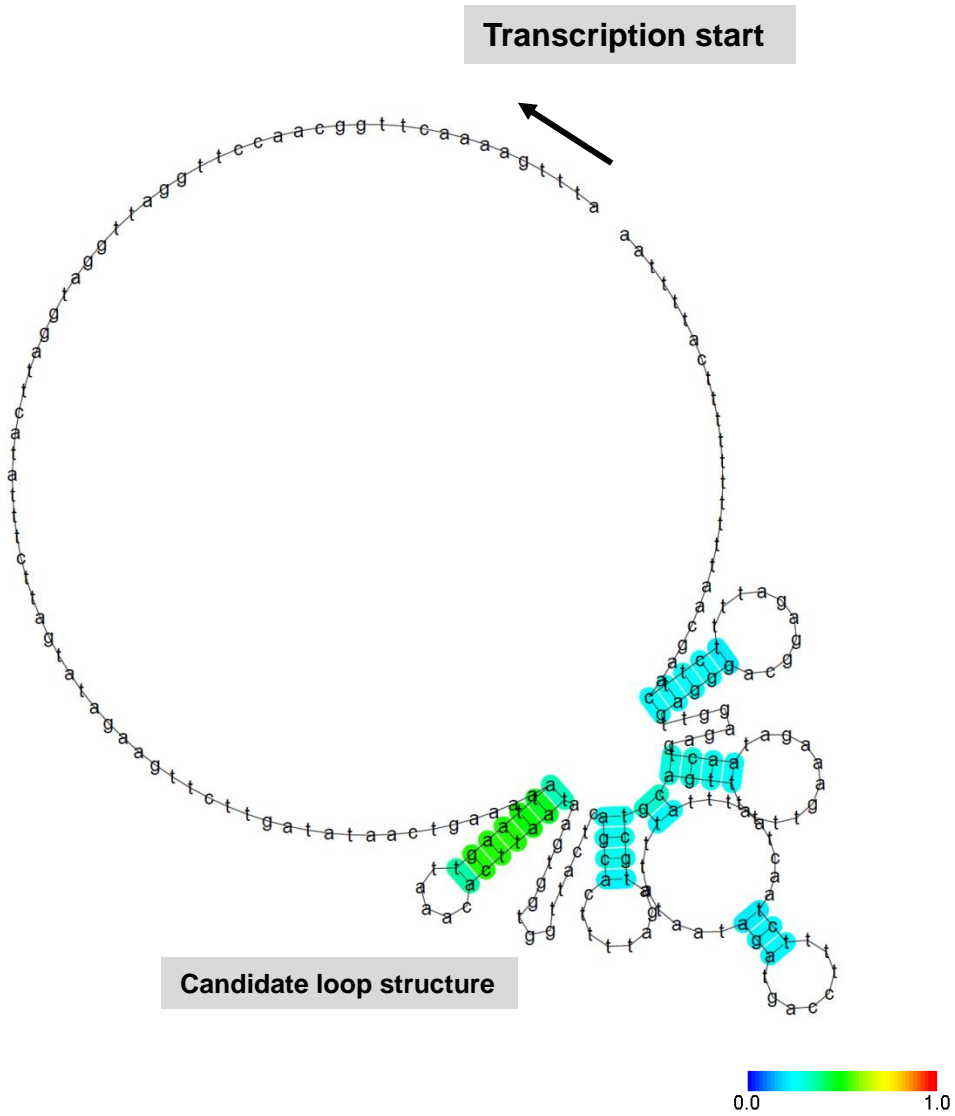

Figure S3. Secondary structure of HIF-1a 5'UTR generated using CentroidFold.

Supplement: NIHMS495532-supplement-4.pdf [file NIHMS495532-supplement-4.pdf]
